# Supplementary material for: Docetaxel-loaded SiO2@Au@GO core–shell nanoparticles for chemo-photothermal therapy of cancer cells
Source: Royal Society of Chemistry journal article supplement (doi:10.1039/c6ra03886g), 2016-01-01
Supplement: c6ra03886g1.pdf [file c6ra03886g1.pdf]

## Docetaxel-loaded SiO<sub>2</sub>@Au@GO core-shell nanoparticles for chemophotothermal therapy of cancer cells

Xiaolin Li,<sup>a,b</sup> Zhi Yang,<sup>b</sup> Nantao Hu,<sup>b</sup> Liying Zhang,<sup>b</sup> Yafei Zhang<sup>\*b</sup> and Lei Yin<sup>\*a</sup>

<sup>a</sup> Department of Urology, Changzheng Hospital The Second Military Medical University, 415 Fengyang Road, Shanghai 200003, PR China.

<sup>b</sup> Key Laboratory for Thin Film and Microfabrication of Ministry of Education, Department of Micro/Nano Electronics, School of Electronic Information and Electrical Engineering, Shanghai Jiao Tong University, Shanghai 200240, P. R. China

\* Corresponding author. E-mail: yin2022@gmail.com; yfzhang@sjtu.edu.cn

**TableS1. Parameters for Synthesis of Silica Nanoparticles with Different Diameter**

| sample  | average size<br>(nm) | NH <sub>4</sub> OH<br>volume(mL) | TEOS<br>volume(mL) | methanol: butanol<br>=1:3(V/V)<br>total volume (mL) | time<br>(h) |
|---------|----------------------|----------------------------------|--------------------|-----------------------------------------------------|-------------|
| Fig. 2a | 143                  | 1.6                              | 0.7                | 40                                                  | 2           |
| Fig. 2b | 222                  | 2                                | 0.5                | 40                                                  | 2           |
| Fig. 2c | 419                  | 3                                | 2                  | 40                                                  | 2           |
| Fig. 2d | 500                  | 4                                | 1                  | 40                                                  | 2           |
| Fig. 2e | 590                  | 6                                | 2                  | 40                                                  | 2           |
| Fig. 2f | 620                  | 8                                | 2                  | 40                                                  | 2           |

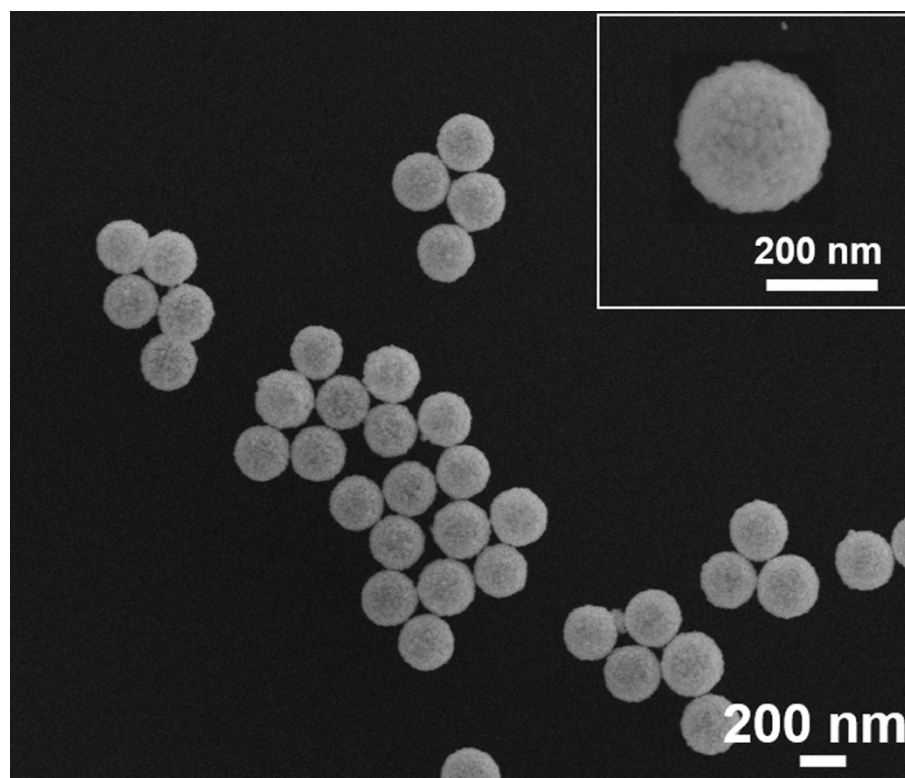

**Figure. S1** The SEM image of SiO<sub>2</sub>@Au NPs. Insert is the magnified SEM image of SiO<sub>2</sub>@Au NPs

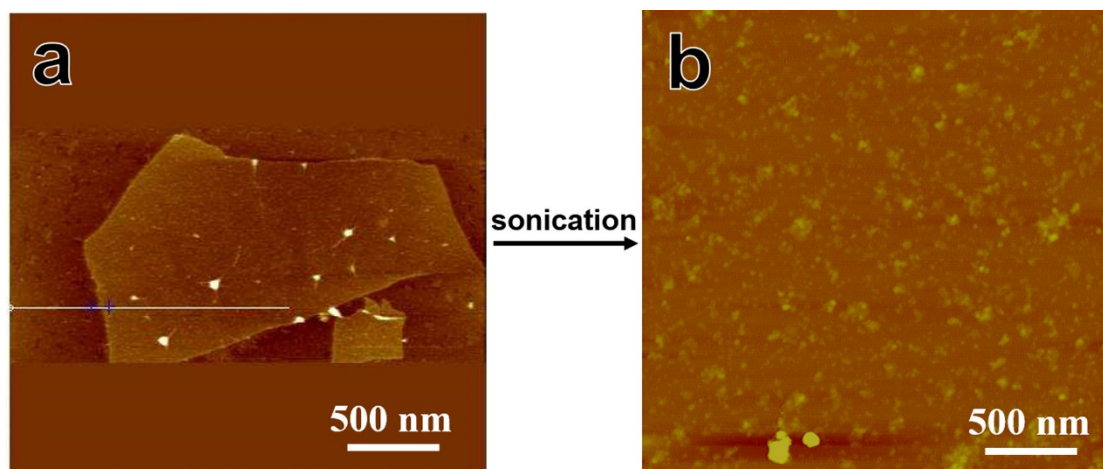

**Figure. S2** The AFM images of as-prepared GO (a) before and (b) after sonication.

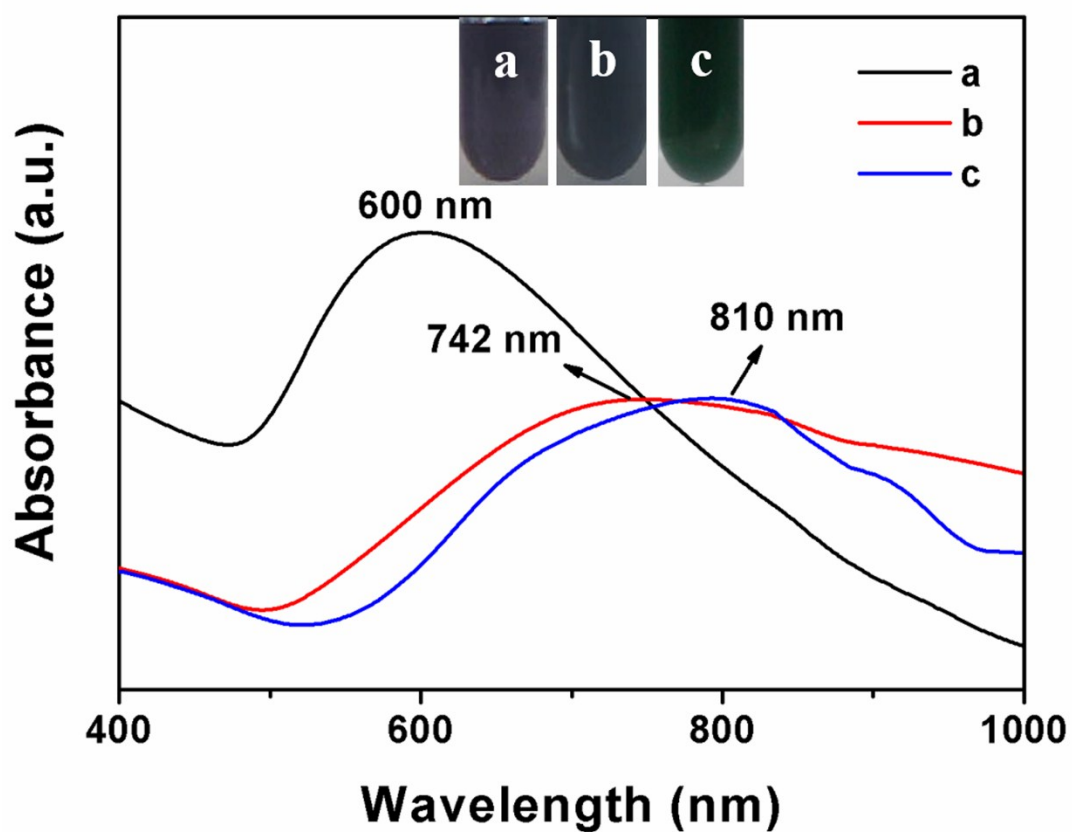

**Figure. S3** The UV-Vis-NIR absorption spectra of  $\text{SiO}_2@\text{Au}$  NPs with different resonance peaks. Inset is the corresponding photo of  $\text{SiO}_2@\text{Au}$  NPs aqueous solution
